# Supplementary material for: Cardiopulmonary recovery after COVID-19: an observational prospective multicentre trial
Source: PubMed Central journal article supplement — Eur Respir J. 2021 Apr 29;57(4):2003481. doi: 10.1183/13993003.03481-2020 (PMC7736754; doi:10.1183/13993003.03481-2020), 2021-04-29
Supplement: ERJ-03481-2020.Questionnaire_English.pdf [file ERJ-03481-2020.Questionnaire_English.pdf]

Date: \_\_\_/\_\_\_/\_\_\_\_\_

# Follow-up care – Questionnaire

## Visit 1

**Country of origin:** ( ) Austria ( ) other: \_\_\_\_\_

**Do you suffer from any pre-existing medical conditions?** (Conditions that require medication or medical consultations)

1) High blood pressure

( ) yes ( ) no ( ) not sure

2) Diseases of the heart (*e.g. heart attacks, heart insufficiency, inflammation of the heart, rhythm disturbances...*)

( ) yes ( ) no ( ) not sure

3) Disturbed blood circulation in the legs

( ) yes ( ) no ( ) not sure

4) Lung diseases (*e.g. COPD, asthma, pulmonary fibrosis, frequent infections/bronchitis...*)

( ) yes ( ) no ( ) not sure

5) Obesity

( ) yes ( ) no ( ) not sure

6) Diabetes

( ) yes ( ) no ( ) not sure

**Do you have any allergies that you are aware of?** (*e.g. medication, food, grass, animal hair...*)

( ) yes ( ) no ( ) not sure

Please specify: \_\_\_\_\_

Animal contact: \_\_\_\_\_

**Do you smoke?**

yes     no     not anymore     passive smoker

How many cigarettes do you smoke per day? \_\_\_\_\_

For how many years have you been smoking? \_\_\_\_\_

**Did you receive any vaccinations in the past five years?** (e.g. flu, pneumococci/pneumonia, pertussis, tick-encephalitis (FSME))

yes     no     not sure

Please specify: \_\_\_\_\_

**What is your profession?** \_\_\_\_\_

**Are you exposed to any harmful substances? (e.g. dust, smoke, gas, toxic substances...)**

yes     no     not sure

**Did you suffer from respiratory problems as a child?**

yes     no     not sure     premature birth

**Do members of your family suffer from any lung diseases? (heredity?)**

yes     no     not sure     premature birth

**COVID-19**

**When was the start of your symptoms?**

\_\_\_/\_\_\_/\_\_\_\_\_     not sure

**When did you seek medical aid for the first time?**

\_\_\_/\_\_\_/\_\_\_\_\_     not sure

**When have you been tested positive for COVID-19?**

\_\_\_/\_\_\_/\_\_\_\_\_     not sure

**Did you suffer from dyspnea or breathing difficulties during Covid-19?**

- Dyspnea only with strenuous exercise
- Dyspnea when hurrying or walking up a slight hill
- Walks slower than people of the same age because of dyspnea or has to stop for breath when walking at own pace
- Stops for breath after walking 100 yards (91 m) or after a few minutes
- Too dyspneic to leave house or breathless when dressing

**Do you suffer from dyspnea or breathing difficulties now?**

- Dyspnea only with strenuous exercise
- Dyspnea when hurrying or walking up a slight hill
- Walks slower than people of the same age because of dyspnea or has to stop for breath when walking at own pace
- Stops for breath after walking 100 yards (91 m) or after a few minutes
- Too dyspneic to leave house or breathless when dressing

**Did you suffer from coughing during COVID-19?**

- no     yes    →  dry cough     wet cough

**Do you suffer from coughing now?**

- no     yes    →  dry cough     wet cough

**Did you suffer from fever during COVID-19?**

- no     yes    → max. temperature \_\_\_\_\_ °C

**Do you suffer from fever now?**

- no     yes    → max. temperature \_\_\_\_\_ °C

**Did you suffer from night sweat during COVID-19?**

- no     yes

**Do you suffer from night sweat now?**

- no     yes

**Did you lose weight during COVID-19?**

no     yes    → how much? \_\_\_\_\_kg

**How has your weight changed now?**

stayed the same     gained weight     lost weight

**How was your physical performance during COVID-19?**

- Fully active, able to carry on all pre-disease performance without restriction
- Restricted in physically strenuous activity but ambulatory and able to carry out work of a light or sedentary nature, e.g., light housework, office work
- Ambulatory and capable of all self-care but unable to carry out any work activities; up and about more than 50% of waking hours
- Capable of only limited self-care; confined to bed or chair more than 50% of waking hours
- Completely disabled; cannot carry on any self-care; totally confined to bed or chair

**How is your physical performance now?**

- Fully active, able to carry on all pre-disease performance without restriction
- Restricted in physically strenuous activity but ambulatory and able to carry out work of a light or sedentary nature, e.g., light housework, office work
- Ambulatory and capable of all self-care but unable to carry out any work activities; up and about more than 50% of waking hours
- Capable of only limited self-care; confined to bed or chair more than 50% of waking hours
- Completely disabled; cannot carry on any self-care; totally confined to bed or chair

**Did you suffer from pain during COVID-19?**

no     yes    →     head     stomach     chest     other: \_\_\_\_\_

**Do you suffer from pain now?**

no     yes    →     head     stomach     chest     other: \_\_\_\_\_

**Did you suffer from gastrointestinal complaints during COVID-19?**

no     yes    →     diarrhea     vomiting     nausea

**Do you suffer from gastrointestinal complaints now?**

no  yes →  diarrhea  vomiting  nausea

**Did you suffer from any problems regarding your sense of smell or taste during COVID-19?**

no  yes

**Do you suffer from any problems regarding your sense of smell or taste now?**

no  yes

**Did you suffer from sleeping disorders during COVID-19?**

no  yes

**Do you suffer from sleeping disorders now?**

no  yes

**Did you notice any anomalies of your skin during COVID-19? (e.g. rashes, itching, scaling...)**

no  yes

**Did you notice any anomalies of your skin now?**

no  yes

**What medication do you take currently?**

1. \_\_\_\_\_
2. \_\_\_\_\_
3. \_\_\_\_\_
4. \_\_\_\_\_
5. \_\_\_\_\_
