# Supplementary material for: Cardiopulmonary recovery after COVID-19: an observational prospective multicentre trial
Source: PubMed Central journal article supplement — Eur Respir J. 2021 Apr 29;57(4):2003481. doi: 10.1183/13993003.03481-2020 (PMC7736754; doi:10.1183/13993003.03481-2020), 2021-04-29
Supplement: ERJ-03481-2020.Questionnaire_German.pdf [file ERJ-03481-2020.Questionnaire_German.pdf]

Patientenetikett

Datum: \_\_/\_\_/\_\_\_\_\_

## Nachsorge – Fragebogen

Herkunftsland:       Österreich       Sonstiges: \_\_\_\_\_

**Sind Vorerkrankungen bekannt?** (Erkrankungen, weshalb sie regelmäßig in ärztlicher Betreuung sind und/oder Medikamente einnehmen)

1) Bluthochdruck                                       Ja                       Nein                       Bin mir nicht sicher

2. Herzerkrankung                                       Ja                       Nein                       Bin mir nicht sicher

(z.B. Herzinfarkt, Herzschwäche, Herz-Entzündung, Rhythmusstörung)

3. Durchblutungsstörung der Beine       Ja                       Nein                       Bin mir nicht sicher

4. Lungenerkrankung                                       Ja                       Nein                       Bin mir nicht sicher

(z.B. COPD, Asthma, Lungenfibrose, häufige Infekte / Bronchitis)

5. Übergewicht                                               Ja                       Nein                       Bin mir nicht sicher

6. Diabetes                                                       Ja                       Nein                       Bin mir nicht sicher

**Haben sie Allergien** (z.b. Medikamente, Lebensmittel, Gräser, Tierhaare)

Ja                       Nein                       Bin mir nicht sicher

Welche: \_\_\_\_\_

Tierkontakt: \_\_\_\_\_

**Rauchen Sie ?**

Ja       Nein       Nicht Mehr       Passivrauch

Wieviele Zigaretten pro Tag: \_\_\_\_\_

Für wieviele Jahre: \_\_\_\_\_

**Wurden Sie in letzter Zeit (5 Jahre) geimpft?** (z.B. Grippe, Lungenentzündung / Pneumokokken, Keuchhusten, FSME)

Ja       Nein       Bin mir nicht sicher

Welche: \_\_\_\_\_

**Welchen Beruf gehen Sie nach?** \_\_\_\_\_

**Haben Sie freizeithlich oder beruflich Kontakt zu Schadstoffen?** (Staub, Rauch, Gases, Gifte)

Ja       Nein       Bin mir nicht sicher

**Hatten Sie in ihrer Kindheit Atembeschwerden?**

Ja       Nein       Bin mir nicht sicher       Frühgeburt

**Gibt es Lungenerkrankungen in Ihrer Familie?** (Erbliche Belastung?)

Ja       Nein       Bin mir nicht sicher       Frühgeburt

**COVID 19**

**Wann haben sie erstmals Symptome entwickelt?**

am: \_\_/ \_\_/ \_\_\_\_\_       Bin mir nicht mehr sicher

**Wann haben sie erstmalig medizinische Hilfe aufgesucht?**

am: \_\_/ \_\_/ \_\_\_\_\_       Bin mir nicht mehr sicher

**Wann wurden Sie positiv getestet?**

am: \_\_/ \_\_/ \_\_\_\_\_       Bin mir nicht mehr sicher

**Haben Sie während der COVID Erkrankung Atemnot bzw. Atembeschwerden verspürt?**

- Keine Atemnot bzw. Atemnot nur bei sehr schwerer Anstrengungen
- Atemnot bei schnellem Gehen oder bei leichten Anstiegen / Treppensteigen
- Langsameres Gehen als Gleichaltrige aufgrund von Atemnot
- Atemnot bei kurzen ebenen Gehstrecken um 100 m
- Atemnot bei geringer Belastung z.B. beim An-/Ausziehen

**Wie sehen sie diese Beschwerden heute?**

- Keine Atemnot bzw. Atemnot nur bei sehr schwerer Anstrengungen
- Atemnot bei schnellem Gehen oder bei leichten Anstiegen / Treppensteigen
- Langsameres Gehen als Gleichaltrige aufgrund von Atemnot
- Atemnot bei kurzen ebenen Gehstrecken um 100 m
- Atemnot bei geringer Belastung z.B. beim An-/Ausziehen

**Hatten sie während der Erkrankung Husten?**

- Nein
- Ja →  Trocken
- Mit Auswurf

**Haben Sie jetzt noch Husten?**

- Nein
- Ja →  Trocken
- Mit Auswurf

**Hatten sie während der Erkrankung Fieber?**

- Nein
- Ja → wie hoch maximal \_\_\_\_\_ °C

**Haben Sie jetzt noch Fieber?**

- Nein
- Ja → wie hoch maximal \_\_\_\_\_ °C

**Hatten Sie während der Erkrankung Nachtschweiß?**

- Nein
- Ja

**Haben Sie jetzt noch Nachtschweiß?**

- Nein
- Ja

**Haben Sie während der Erkrankung Gewicht verloren?**

Nein  Ja → wieviel? \_\_\_\_\_ kg

**Wie hat sich das Gewicht nun verändert?**

Gleich  wieder zugenommen  weiter abgenommen

**Wie war Ihre körperliche Leistungsfähigkeit während der Erkrankung**

- Normal, keine Einschränkung, wie vor der Erkrankung
- Einschränkung bei Anstrengung, leichte körperliche Arbeit war möglich
- Selbstversorgung war möglich, aber nicht arbeitsfähig, weniger als 50% der Zeit untertags im Bett
- begrenzte Selbstversorgung möglich; 50% oder mehr Zeit untertags im Bett verbracht
- Völlig pflegebedürftig, keinerlei Selbstversorgung möglich, völlig an Bett oder Stuhl gebunden

**Wie ist Ihre körperliche Leistungsfähigkeit jetzt?**

- Normal, keine Einschränkung, wie vor der Erkrankung
- Einschränkung bei Anstrengung, leichte körperliche Arbeit war möglich
- Selbstversorgung war möglich, aber nicht arbeitsfähig, weniger als 50% der Zeit untertags im Bett
- begrenzte Selbstversorgung möglich; 50% oder mehr Zeit untertags im Bett verbracht
- Völlig pflegebedürftig, keinerlei Selbstversorgung möglich, völlig an Bett oder Stuhl gebunden

**Hatten Sie während der Erkrankung Schmerzen?**

Nein  Ja →  Kopf  Bauch  Brust  Sonstige: \_\_\_\_\_

**Haben Sie jetzt noch Schmerzen?**

Nein  Ja →  Kopf  Bauch  Brust  Sonstige: \_\_\_\_\_

**Hatten Sie während der Erkrankung Magen-Darm Beschwerden?**

Nein  Ja →  Durchfall  Erbrechen  Übelkeit

**Hatten Sie jetzt noch Magen-Darm Beschwerden?**

Nein  Ja →  Durchfall  Erbrechen  Übelkeit

**Hatten Sie während der Erkrankung Geruchs-/ Geschmacksstörung?**

Nein  Ja

**Haben Sie jetzt noch Geruchs-/ Geschmacksstörung?**

Nein  Ja

**Hatten Sie während der Erkrankung an Schlafstörungen gelitten?**

Nein  Ja

**Haben Sie jetzt noch Schlafstörungen?**

Nein  Ja

**Hatten Sie während der Erkrankung Auffälligkeiten der Haut bemerkt (z.B. Ausschlag, Juckreiz, Schuppung usw.)?**

Nein  Ja

**Haben Sie aktuell noch Auffälligkeiten der Haut bemerkt?**

Nein  Ja

**Welche Medikamente nehmen Sie derzeit?**

1. \_\_\_\_\_

2. \_\_\_\_\_

3. \_\_\_\_\_

4. \_\_\_\_\_

5. \_\_\_\_\_
