# Supplementary material for: Cardiopulmonary recovery after COVID-19: an observational prospective multicentre trial
Source: PubMed Central journal article supplement — Eur Respir J. 2021 Apr 29;57(4):2003481. doi: 10.1183/13993003.03481-2020 (PMC7736754; doi:10.1183/13993003.03481-2020), 2021-04-29
Supplement: ERJ-03481-2020.Shareable.pdf [file ERJ-03481-2020.Shareable.pdf]

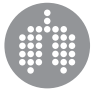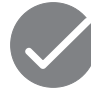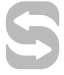

SHAREABLE PDF

# Cardiopulmonary recovery after COVID-19: an observational prospective multicentre trial

Thomas Sonnweber <sup>1,16</sup>, Sabina Sahanic<sup>1,16</sup>, Alex Pizzini <sup>1</sup>, Anna Luger<sup>2</sup>, Christoph Schwabl<sup>2</sup>, Bettina Sonnweber<sup>3</sup>, Katharina Kurz <sup>1</sup>, Sabine Koppelstätter<sup>1</sup>, David Haschka<sup>1</sup>, Verena Petzer<sup>4</sup>, Anna Boehm <sup>1</sup>, Magdalena Aichner<sup>1</sup>, Piotr Tymoszek <sup>1</sup>, Daniela Lener <sup>5</sup>, Markus Theurl<sup>5</sup>, Almut Lorscheid-Köhler<sup>1</sup>, Amra Tancevski <sup>1</sup>, Anna Schapfl<sup>3</sup>, Marc Schaber<sup>3</sup>, Richard Hilbe<sup>1</sup>, Manfred Nairz<sup>1</sup>, Bernhard Puchner<sup>6</sup>, Doris Hüttenberger<sup>1</sup>, Christoph Tschurtschenthaler<sup>1</sup>, Malte Aßhoff<sup>1</sup>, Andreas Peer<sup>7</sup>, Frank Hartig<sup>7</sup>, Romuald Bellmann<sup>7</sup>, Michael Joannidis<sup>7</sup>, Can Gollmann-Tepeköylü <sup>8</sup>, Johannes Holfeld<sup>8</sup>, Gudrun Feuchtner <sup>2</sup>, Alexander Egger<sup>9</sup>, Gregor Hoermann<sup>9,10,11</sup>, Andrea Schroll<sup>1</sup>, Gernot Fritsche<sup>1</sup>, Sophie Wildner<sup>1</sup>, Rosa Bellmann-Weiler<sup>1</sup>, Rudolf Kirchmair<sup>5,6</sup>, Raimund Helbok<sup>12</sup>, Helmut Prosch <sup>13</sup>, Dietmar Rieder<sup>14</sup>, Zlatko Trajanoski<sup>14</sup>, Florian Kronenberg<sup>15</sup>, Ewald Wöll<sup>3</sup>, Günter Weiss <sup>1</sup>, Gerlig Widmann<sup>2,17</sup>, Judith Löffler-Ragg<sup>1,17</sup> and Ivan Tancevski <sup>1,17</sup>

**Affiliations:** <sup>1</sup>Dept of Internal Medicine II, Medical University of Innsbruck, Innsbruck, Austria. <sup>2</sup>Dept of Radiology, Medical University of Innsbruck, Innsbruck, Austria. <sup>3</sup>Dept of Internal Medicine, St Vinzenz Hospital, Zams, Austria. <sup>4</sup>Dept of Internal Medicine V, Medical University of Innsbruck, Innsbruck, Austria. <sup>5</sup>Dept of Internal Medicine III, Medical University of Innsbruck, Innsbruck, Austria. <sup>6</sup>The Karl Landsteiner Institute, Reha Zentrum Münster, Münster, Austria. <sup>7</sup>Division of Intensive Care and Emergency Medicine, Dept of Internal Medicine I, Medical University of Innsbruck, Innsbruck, Austria. <sup>8</sup>Dept of Cardiac Surgery, Medical University of Innsbruck, Innsbruck, Austria. <sup>9</sup>Central Institute of Medical and Chemical Laboratory Diagnostics, University Hospital Innsbruck, Innsbruck, Austria. <sup>10</sup>Dept of Laboratory Medicine, Medical University of Vienna, Vienna, Austria. <sup>11</sup>MLL Munich Leukemia Laboratory, Munich, Germany. <sup>12</sup>Dept of Neurology, Medical University of Innsbruck, Innsbruck, Austria. <sup>13</sup>Dept of Biomedical Imaging and Image-guided Therapy, Medical University Vienna, Vienna, Austria. <sup>14</sup>Institute for Bioinformatics, Medical University of Innsbruck, Innsbruck, Austria. <sup>15</sup>Institute of Genetic Epidemiology, Medical University of Innsbruck, Innsbruck, Austria. <sup>16</sup>Contributed equally as first authors. <sup>17</sup>Contributed equally to this article as lead authors and supervised the work.

**Correspondence:** Judith Löffler-Ragg, Anichstraße 35, 6020 Innsbruck, Austria.  
E-mail: judith.loeffler@i-med.ac.at

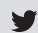

@ERSpublications

**100 days after COVID-19 onset, a high portion of patients exhibit persisting symptoms and cardiopulmonary impairment. Still, a marked improvement of symptoms, pulmonary function and CT pathologies was found at follow-up.** <https://bit.ly/35YP13g>

**Cite this article as:** Sonnweber T, Sahanic S, Pizzini A, *et al.* Cardiopulmonary recovery after COVID-19: an observational prospective multicentre trial. *Eur Respir J* 2021; 57: 2003481 [<https://doi.org/10.1183/13993003.03481-2020>].

This single-page version can be shared freely online.

## ABSTRACT

**Background:** After the 2002/2003 severe acute respiratory syndrome outbreak, 30% of survivors exhibited persisting structural pulmonary abnormalities. The long-term pulmonary sequelae of coronavirus disease 2019 (COVID-19) are yet unknown, and comprehensive clinical follow-up data are lacking.

**Methods:** In this prospective, multicentre, observational study, we systematically evaluated the cardiopulmonary damage in subjects recovering from COVID-19 at 60 and 100 days after confirmed diagnosis. We conducted a detailed questionnaire, clinical examination, laboratory testing, lung function analysis, echocardiography and thoracic low-dose computed tomography (CT).

**Results:** Data from 145 COVID-19 patients were evaluated, and 41% of all subjects exhibited persistent symptoms 100 days after COVID-19 onset, with dyspnoea being most frequent (36%). Accordingly, patients still displayed an impaired lung function, with a reduced diffusing capacity in 21% of the cohort being the most prominent finding. Cardiac impairment, including a reduced left ventricular function or signs of pulmonary hypertension, was only present in a minority of subjects. CT scans unveiled persisting lung pathologies in 63% of patients, mainly consisting of bilateral ground-glass opacities and/or reticulation in the lower lung lobes, without radiological signs of pulmonary fibrosis. Sequential follow-up evaluations at 60 and 100 days after COVID-19 onset demonstrated a vast improvement of symptoms and CT abnormalities over time.

**Conclusion:** A relevant percentage of post-COVID-19 patients presented with persisting symptoms and lung function impairment along with radiological pulmonary abnormalities >100 days after the diagnosis of COVID-19. However, our results indicate a significant improvement in symptoms and cardiopulmonary status over time.
